# Supplementary material
Source: PubMed Central journal article supplement (PMC3374669)
Supplement: supp_jn.111.155903_nut155903-SFig_1.pdf [file supp_jn.111.155903_nut155903-SFig_1.pdf]

## Online Supporting Material

**A**

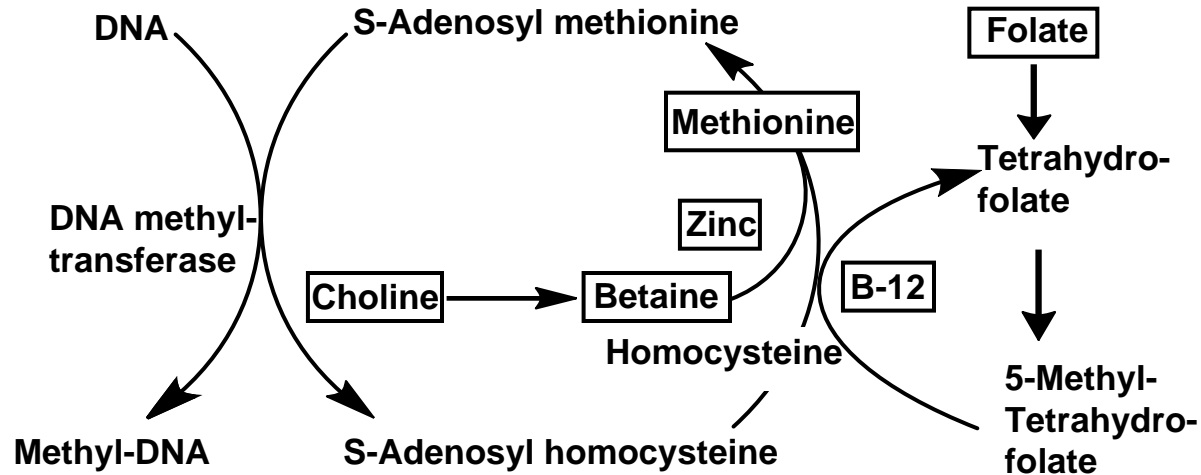

**B**

| Diet           | L-Methionine <sup>1</sup> | Vitamin B-12 | Folic acid | Choline | Betaine | Zinc   | Protein              | Carbohydrate | Fat  |
|----------------|---------------------------|--------------|------------|---------|---------|--------|----------------------|--------------|------|
|                | ----- g/kg -----          |              |            |         |         |        | ----- % energy ----- |              |      |
| <b>Control</b> | 4.30                      | 0.0620       | 0.00300    | 1.35    | 0       | 0.0500 | 17.6                 | 64.0         | 18.4 |
| <b>MS</b>      | 11.8                      | 1.56         | 0.0135     | 19.4    | 15.0    | 0.780  | 18.8                 | 62.1         | 19.1 |

<sup>1</sup>The other amino acid concentrations of the diets were the same.

**Supplemental Figure 1.** The relationship between the DNA methylation, methionine and folate cycles (A), as well as the amount of micro- and macro-nutrient content of the control and MS prenatal diets (B). Boxes denote the ingredients that were supplemented to the control diet.
