# Supplementary material
Source: PubMed Central journal article supplement (PMC3374669)
Supplement: supp_jn.111.155903_nut155903-SFig_2.pdf [file supp_jn.111.155903_nut155903-SFig_2.pdf]

## Online Supporting Material

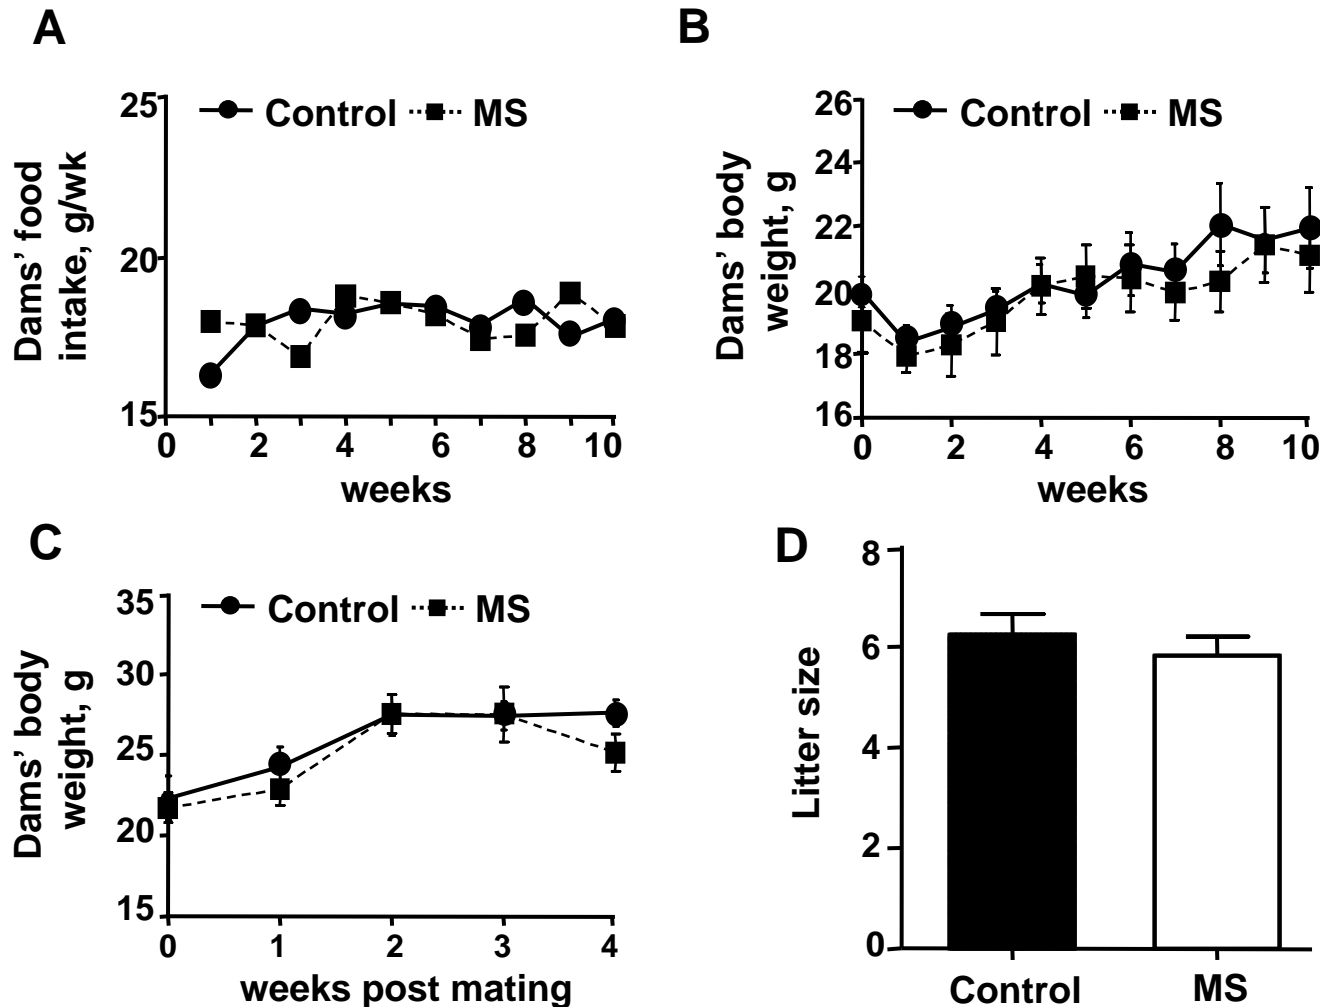

**Supplemental Figure 2.** Amount of the control and MS diet consumed by dams per week over a 10 week period (A); weight change of dams over 10 weeks after switching from the standard diet to the control and MS diets (B); weight changes of dams over the weeks following mating (C); pup litter size from dams on the control and MS diets (D). Results are mean  $\pm$  SEM,  $n = 5$  (A, B, C) mice per diet or  $n = 28$  (control) or 27 (MS) pregnancies (D).
