# Supplementary material
Source: PubMed Central journal article supplement (PMC3374669)
Supplement: supp_jn.111.155903_nut155903-SFig_3.pdf [file supp_jn.111.155903_nut155903-SFig_3.pdf]

## Online Supporting Material

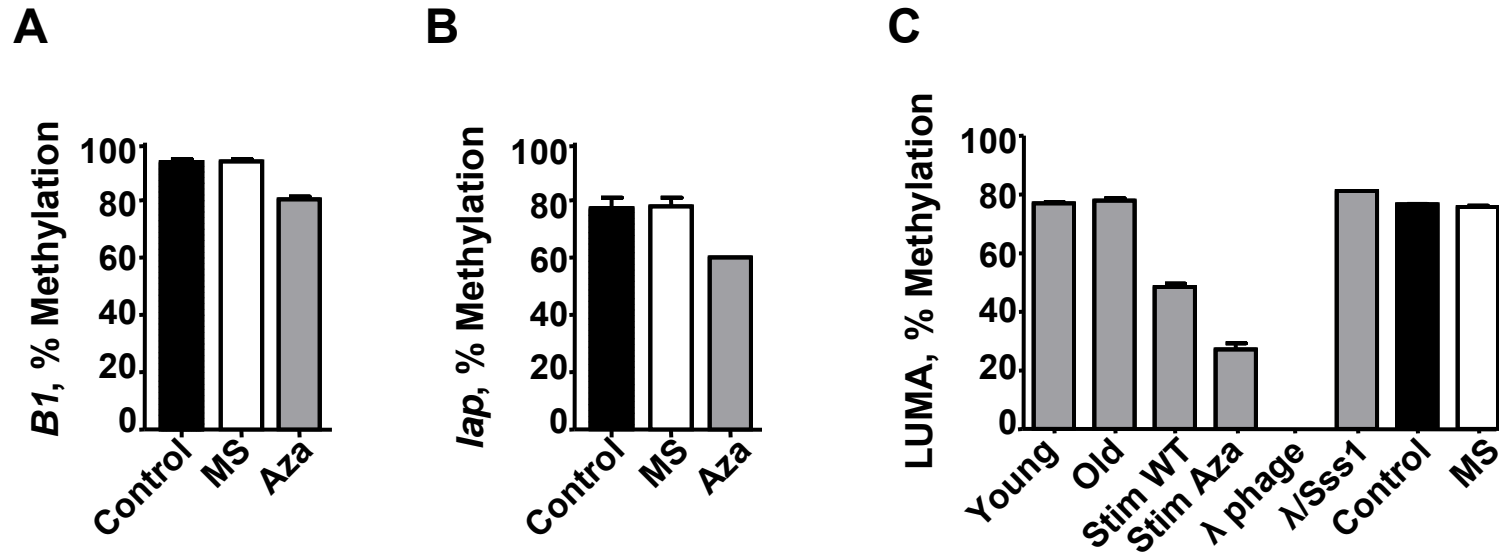

**Supplemental Figure 3.** Estimating global methylation of T cells from F1 control and MS mice via pyrosequencing of the B1 repetitive element (A), IAP repetitive element (B), or the LUMA method, using WT C57Bl/6 murine resting T cells, stimulated T cells, 5-azacytidine treated T cells, and methylated or unmethylated  $\lambda$  phage as controls (C). Results are mean  $\pm$  SEM,  $n = 6$  (A),  $n = 3$  (B),  $n = 7$  (C). Aza = 5-azacytidine treatment, B1 = B1 element, *lap* = Intracisternal alpha particle, LUMA = Luminometric Methylation Assay, MS = micronutrient supplemented diet, Stim = PHA stimulated cells, Sss1 = Sss1 methylase treatment, WT = wild type.
