# Supplementary material
Source: PubMed Central journal article supplement (PMC3374669)
Supplement: supp_jn.111.155903_nut155903-ST_1.pdf [file supp_jn.111.155903_nut155903-ST_1.pdf]

## Online Supporting Material

**Supplemental Table 1: Diet Composition<sup>1,2</sup>**

| Ingredient                                                                      | Control | MS   | Ingredient                                                                                       | Control | MS    |
|---------------------------------------------------------------------------------|---------|------|--------------------------------------------------------------------------------------------------|---------|-------|
| L-Arginine, <i>g/kg</i>                                                         | 4.02    | 4.02 | K <sub>2</sub> SO <sub>4</sub> , <i>g/kg</i>                                                     | 1.63    | 1.63  |
| L-Arginine HCl, <i>g/kg</i>                                                     | 13.9    | 13.9 | Ferric Citrate, <i>mg/kg</i>                                                                     | 212     | 212   |
| L-Asparagine, <i>g/kg</i>                                                       | 6.90    | 6.90 | ZnCO <sub>3</sub> , <i>mg/kg</i>                                                                 | 57.8    | 57.8  |
| L-Aspartic Acid, <i>g/kg</i>                                                    | 4.02    | 4.02 | MnCO <sub>3</sub> , <i>mg/kg</i>                                                                 | 22.1    | 22.1  |
| L-Cystine, <i>g/kg</i>                                                          | 2.50    | 2.50 | KIO <sub>3</sub> , <i>mg/kg</i>                                                                  | 0.350   | 0.350 |
| L-Glutamic Acid, <i>g/kg</i>                                                    | 46.0    | 46.0 | Na <sub>2</sub> SeO <sub>4</sub> , <i>mg/kg</i>                                                  | 0.361   | 0.361 |
| Glycine, <i>g/kg</i>                                                            | 26.8    | 26.8 | (NH <sub>4</sub> ) <sub>6</sub> Mo <sub>7</sub> O <sub>24</sub> ·4H <sub>2</sub> O, <i>mg/kg</i> | 0.280   | 0.280 |
| L-Histidine HCl, H <sub>2</sub> O, <i>g/kg</i>                                  | 5.17    | 5.17 | Na <sub>2</sub> SiO <sub>3</sub> ·9H <sub>2</sub> O, <i>mg/kg</i>                                | 50.8    | 50.8  |
| L-Isoleucine, <i>g/kg</i>                                                       | 9.43    | 9.43 | LiCl, <i>mg/kg</i>                                                                               | 0.609   | 0.609 |
| L-leucine, <i>g/kg</i>                                                          | 12.8    | 12.8 | Boric Acid, <i>mg/kg</i>                                                                         | 2.85    | 2.85  |
| L-Lysine HCl, <i>g/kg</i>                                                       | 20.7    | 20.7 | NaF, <i>mg/kg</i>                                                                                | 2.22    | 2.22  |
| L-Methionine, <i>g/kg</i>                                                       | 4.30    | 11.8 | NH <sub>4</sub> VO <sub>3</sub> , <i>mg/kg</i>                                                   | 0.231   | 0.231 |
| L-Phenylalanine, <i>g/kg</i>                                                    | 8.63    | 8.63 | 2NiCO <sub>3</sub> ·3Ni(OH) <sub>2</sub> ·                                                       |         |       |
| L-Proline, <i>g/kg</i>                                                          | 4.02    | 4.02 | 4H <sub>2</sub> O, <i>mg/kg</i>                                                                  | 1.11    | 1.11  |
| L-Serine, <i>g/kg</i>                                                           | 4.02    | 4.02 | Niacin, <i>mg/kg</i>                                                                             | 45.0    | 45.0  |
| L-Threonine, <i>g/kg</i>                                                        | 9.40    | 9.40 | Calcium Pantothenate,                                                                            |         |       |
| L-Tryptophan, <i>g/kg</i>                                                       | 2.07    | 2.07 | <i>mg/kg</i>                                                                                     | 24.0    | 24.0  |
| L-Tyrosine, <i>g/kg</i>                                                         | 5.75    | 5.75 | Pyridoxine HCl, <i>mg/kg</i>                                                                     | 10.5    | 10.5  |
| L-Valine, <i>g/kg</i>                                                           | 9.43    | 9.43 | Thiamin HCl, <i>mg/kg</i>                                                                        | 9.00    | 9.00  |
| Sucrose, <i>g/kg</i>                                                            | 350     | 350  | Riboflavin, <i>mg/kg</i>                                                                         | 9.00    | 9.00  |
| Corn Starch, <i>g/kg</i>                                                        | 150     | 150  | Folic Acid, <i>mg/kg</i>                                                                         | 3.00    | 13.5  |
| Maltodextrin,                                                                   |         |      | Biotin, <i>mg/kg</i>                                                                             | 0.300   | 0.300 |
| Lo-Dex 10, <i>g/kg</i>                                                          | 150     | 150  | Vitamin B-12                                                                                     |         |       |
| Cellulose (Solka Floc)-                                                         |         |      | (0.1% in mannitol), <i>g/kg</i>                                                                  | 0.0625  | 1.56  |
| non-Nutritive Fiber, <i>g/kg</i>                                                | 30.0    | 30.0 | α-tocopherol acetate                                                                             |         |       |
| Soybean Oil, <i>g/kg</i>                                                        | 80.0    | 80.0 | (500 IU/g)                                                                                       | 225     | 225   |
| Ca(H <sub>2</sub> PO <sub>4</sub> ) <sub>2</sub> ·H <sub>2</sub> O, <i>g/kg</i> | 8.20    | 8.20 | Vitamin A Palmitate                                                                              |         |       |
| CaCO <sub>3</sub> , <i>g/kg</i>                                                 | 13.5    | 13.5 | (500,000 IU/g)                                                                                   | 12.0    | 12.0  |
| MgO, <i>g/kg</i>                                                                | 1.95    | 1.95 | Cholecalciferol                                                                                  |         |       |
| CuCO <sub>3</sub> , <i>g/kg</i>                                                 | 25.7    | 25.7 | (500,000 IU/g)                                                                                   | 3.00    | 3.00  |
| FeSO <sub>4</sub> ·7H <sub>2</sub> O, <i>mg/kg</i>                              | 210     | 210  | Phylloquinone                                                                                    | 1.12    | 1.12  |
| Na <sub>2</sub> SeO <sub>3</sub> (0.044%                                        |         |      | Betaine, anhydrous, <i>mg/kg</i>                                                                 | 0       | 15.0  |
| in sucrose), <i>g/kg</i>                                                        | 1.25    | 1.25 | Choline Chloride, <i>g/kg</i>                                                                    | 1.35    | 19.4  |
| ZnSO <sub>4</sub> ·7H <sub>2</sub> O, <i>mg/kg</i>                              | 0       | 720  | TBHQ, antioxidant, <i>mg/kg</i>                                                                  | 20.0    | 20.0  |
| KH <sub>2</sub> PO <sub>4</sub> , <i>g/kg</i>                                   | 8.75    | 8.75 |                                                                                                  |         |       |
| Potassium Citrate, <i>mg/kg</i>                                                 | 980     | 980  |                                                                                                  |         |       |
| NaCl, <i>g/kg</i>                                                               | 2.59    | 2.5  |                                                                                                  |         |       |

<sup>1</sup>Diets are modifications of TD.99366.

<sup>2</sup>Diet ingredient concentrations are presented to 3 significant digits. More precisely defined concentrations are available from Harlan Teklad.
