# Supplementary material
Source: PubMed Central journal article supplement (PMC3374669)
Supplement: supp_jn.111.155903_nut155903-ST_2.pdf [file supp_jn.111.155903_nut155903-ST_2.pdf]

## Online Supporting Material

**Supplemental Table 2:** Primer sequences used for RT-PCR (A) and for Pyrosequencing (B)<sup>1</sup>.

**A**

|                       |                                                                              |
|-----------------------|------------------------------------------------------------------------------|
| <b><i>Ccr2</i></b>    | F 5' –AGACCAGAAGAGGGCATTGG– 3'<br>R 5' –CCGTGGATGAACTGAGGTAAC– 3'            |
| <b><i>Ccr5</i></b>    | F 5'- TAGATGAGGGCTGTTTCCATAG -3'<br>R 5'-CTTCCAGAGATGATGACTGCTAAG -3'        |
| <b><i>Cxcr3</i></b>   | F 5' – AAGTGCTTGTCCTCCTTGTAGTTG – 3'<br>R 5' – GTGTTGTCCTTGTTGCTGAGATTG – 3' |
| <b><i>Cxcr4</i></b>   | F 5' – GCTGGCTGAAAAGGCAGTCTATG – 3'<br>R 5' – ACACCACCATCCACAGGCTATC – 3'    |
| <b><i>β-Actin</i></b> | F 5'- GCTACAGCTTCACCACCACA – 3'<br>R 5' – TCTCCAGGGAGGAAGAGGAT – 3'          |

**B**

|                                      |                                                                              |
|--------------------------------------|------------------------------------------------------------------------------|
| <b><i>B1</i></b>                     | F 5'- TGGTGGTGGTGGTTGAGAT – 3'<br>R 5' –Biotin-AATAACACACACCTTTAATCCCAA – 3' |
| <b><i>B1</i> Sequencing primer A</b> | 5' – TGGTGGTGGTGGTTGAGATAG – 3'                                              |
| <b><i>B1</i> Sequencing primer B</b> | 5' – TTTGTAGATTAGGTTGGTTT – 3'                                               |
| <b><i>lap</i></b>                    | F 5' – GTGGTTTTTTATTTTATGTGTTTTG – 3'<br>R 5' –Biotin-CACAACAAACCAAATCTTCTAC |
| <b><i>lap</i> Sequencing Primer</b>  | 5' – GTGGTTTTTTATTTTATGTGTTTTG – 3                                           |

<sup>1</sup>*B1* = B1 element, *Ccr* = C-C chemokine receptor, *Cxcr* = C-x-C chemokine receptor, F = forward primer, *lap* = intracisternal  $\alpha$ -particle, R = reverse primer
