# Supplementary material
Source: PubMed Central journal article supplement (PMC3374669)
Supplement: supp_jn.111.155903_nut155903-ST_3.pdf [file supp_jn.111.155903_nut155903-ST_3.pdf]

## Online Supporting Material

**Supplemental Table 3.** Body composition of 4 wk F1 mice born from dams fed either control or MS diet<sup>1,2</sup>.

| Group          | <i>n</i> | Fluid         | Muscle    | Fat        |
|----------------|----------|---------------|-----------|------------|
|                |          | ----- % ----- |           |            |
| Control male   | 7        | 8.6 ± 0.16    | 85 ± 0.45 | 5.7 ± 0.19 |
| MS male        | 7        | 8.7 ± 0.14    | 86 ± 0.92 | 5.2 ± 0.23 |
| Control Female | 7        | 9.1 ± 0.30    | 83 ± 0.43 | 7.2 ± 0.51 |
| MS Female      | 6        | 8.7 ± 0.21    | 82 ± 1.8  | 8.3 ± 1.0  |

<sup>1</sup>Values are mean ± SEM

<sup>2</sup>F1 = first filial generation, MS = micronutrient supplemented diet<sup>14</sup>
