# Supplementary material
Source: PubMed Central journal article supplement (PMC3374669)
Supplement: supp_jn.111.155903_nut155903-ST_4.pdf [file supp_jn.111.155903_nut155903-ST_4.pdf]

## Online Supporting Material

**Supplemental Table 4.** Splenocyte immune cells populations from 4 wk F1 control or MS mice as analyzed by flow cytometry<sup>1,2</sup>.

| Diet           | CD3             | CD19            | CD11B             | CD11C             | NK1.1             | Other           |
|----------------|-----------------|-----------------|-------------------|-------------------|-------------------|-----------------|
|                | -----%-----     |                 |                   |                   |                   |                 |
| <b>Control</b> | <b>24 ± 1.9</b> | <b>41 ± 1.9</b> | <b>16 ± 1.9</b>   | <b>2.8 ± 0.23</b> | <b>5.0 ± 0.43</b> | <b>11 ± 3.2</b> |
| <b>MS</b>      | <b>25 ± 1.5</b> | <b>43 ± 3.2</b> | <b>9.4 ± 1.0*</b> | <b>3.7 ± 0.65</b> | <b>6.7 ± 1.7</b>  | <b>12 ± 6.3</b> |

<sup>1</sup>Data is mean ± SEM, n =3.

<sup>2</sup>CD = cluster of differentiation, F1 = first filial generation, MS = micronutrient supplemented mice, NK = natural killer.

\*Different from control, P<0.05.
